# Supplementary material for: Application of a highly simulated and adaptable training system in the laparoscopic training course for surgical residents: Experience from a high-volume teaching hospital in China
Source: PubMed Central journal article supplement (PMC9941944; doi:10.1016/j.heliyon.2023.e13317), 2023-02-02
Supplement: mmc1.pdf [file mmc1.pdf]

**Application of a highly simulated and adaptable training system in  
the laparoscopic training course for surgical residents: experience  
from a high-volume teaching hospital in China**

**Baseline information collection**

Your name

Your gender

Your mobile phone number

Your email address

The year you began your standardized residency training

The department where you are now

Your job ID/student ID

Interest in laparoscopic surgery

- None
- Low
- Moderate
- High

**Years of laparoscopic operation (years)**

0

1

2

3

More than 3

## The subjective assessment of the stage one curriculum setting

Classroom environment layout and atmosphere (The full score is 5 points)

Teaching methods and schedule (The full score is 5 points)

Adequate practice opportunities (The full score is 5 points)

Course contributes to clinical work (The full score is 5 points)

Course meets pre-course expectations (The full score is 5 points)

Training supplies preparation (The full score is 5 points)

## The questionnaire survey before stage two course

Basic theoretical knowledge of laparoscopy (The full score is 5 points)

Basic skills of laparoscopy (The full score is 5 points)

Laparoscopic suture technique (The full score is 5 points)

Camera-holding technique (The full score is 5 points)

## The questionnaire survey after stage two course

Basic theoretical knowledge of laparoscopy (The full score is 5 points)

Basic skills of laparoscopy (The full score is 5 points)

Laparoscopic suture technique (The full score is 5 points)

Camera-holding technique (The full score is 5 points)
